# Supplementary material
Source: PubMed Central journal article supplement (PMC1352325)
Supplement: NIHMS7117-supplement-Figure_S1.pdf [file NIHMS7117-supplement-Figure_S1.pdf]

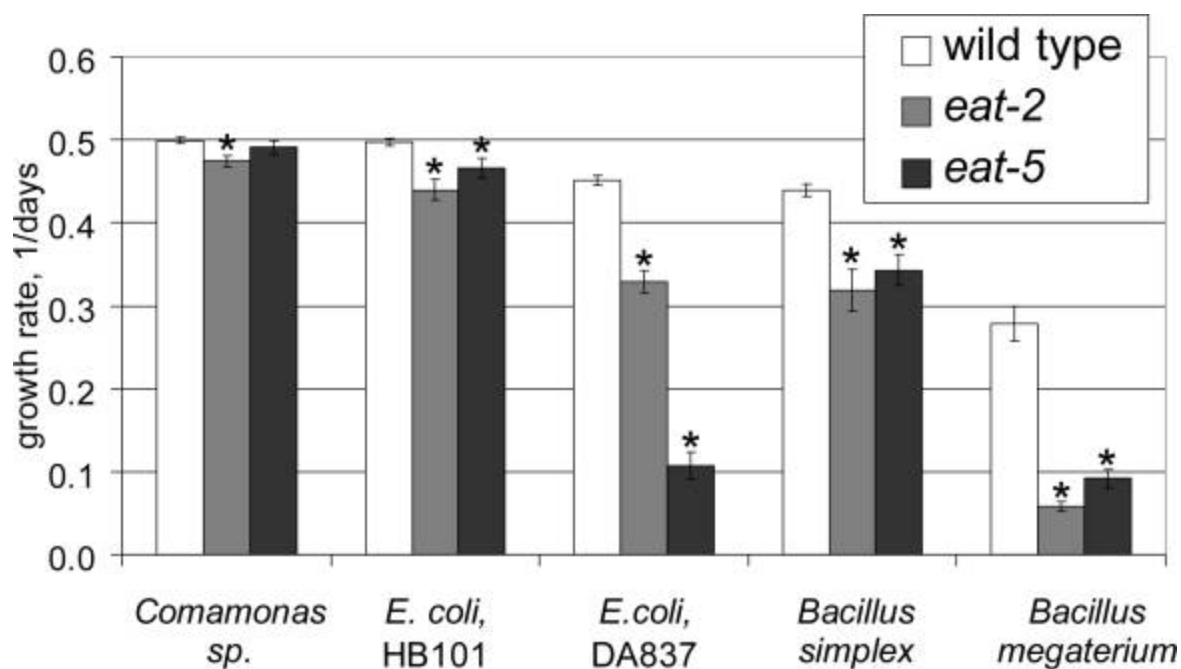

Supplemental figure S1. **Varying ability of different bacterial species to support *C.elegans* growth.** N=6 to 8 for wild type, 9 to 10 for *eat-2* and 5 for *eat-5*, each data point is a different experiment done on two plates with 50-100 worms per plate. In cases of large variability between individual worms (*eat-5* on DA837, *eat-2* on *Bacillus megaterium*, and *eat-5* on *Bacillus megaterium*), the growth rates were measured on single worms, one per plate (41,45, 43 animals respectively). Here and throughout the paper, a sporulation-deficient variety of *Bacillus megaterium* was used (see Methods). Mean  $\pm$  SEM. \*Significantly different from the WT on the same bacteria,  $P < 0.01$  (Student's T-test).
